# Supplementary material for: SARS-CoV-2 infection establishes a stable and age-independent CD8+ T cell response against a dominant nucleocapsid epitope using restricted T cell receptors
Source: PubMed Central journal article supplement (PMC10593757; doi:10.1038/s41467-023-42430-z), 2023-10-23
Supplement: 41467_2023_42430_MOESM1_ESM.pdf [file 41467_2023_42430_MOESM1_ESM.pdf]

## **SARS-CoV-2 infection establishes a stable and age-independent CD8<sup>+</sup> T cell response against a dominant nucleocapsid epitope using restricted T cell receptors**

### Authors:

Cecily Choy<sup>1\*</sup>, Joseph Chen<sup>1\*</sup>, Jiangyuan Li<sup>1</sup>, D. Travis Gallagher<sup>2</sup>, Jian Lu<sup>1</sup>, Daichao Wu<sup>3</sup>, Ainslee Zou<sup>1</sup>, Humza Hemani<sup>1</sup>, Beverly A. Baptiste<sup>1</sup>, Emily Wichmann<sup>1</sup>, Qian Yang<sup>1</sup>, Jeffrey Ciffelo<sup>1</sup>, Rui Yin<sup>3</sup>, Julia McKelvy<sup>4</sup>, Denise Melvin<sup>4</sup>, Tonya Wallace<sup>1</sup>, Christopher Dunn<sup>1</sup>, Cuong Nguyen<sup>1</sup>, Chee W. Chia<sup>4</sup>, Jinshui Fan<sup>5</sup>, Jeannie Ruffolo<sup>6</sup>, Linda Zukley<sup>6</sup>, Guixin Shi<sup>7</sup>, Tomokazu Amano<sup>8</sup>, Yang An<sup>9</sup>, Osorio Meirelles<sup>10</sup>, Wells W. Wu<sup>11</sup>, Chao-Kai Chou<sup>11</sup>, Rong-Fong Shen<sup>11</sup>, Richard A. Willis<sup>12</sup>, Minoru S.H. Ko<sup>8</sup>, Yu-Tsueng Liu<sup>7</sup>, Supriyo De<sup>5</sup>, Brian G. Pierce<sup>3</sup>, Luigi Ferrucci<sup>6</sup>, Josephine Egan<sup>4</sup>, Roy Mariuzza<sup>3</sup>, and Nan-ping Weng<sup>1\*#</sup>

### Affiliations:

<sup>1</sup> Laboratory of Molecular Biology and Immunology, National Institute on Aging, NIH, Baltimore, MD, USA

<sup>2</sup> National Institute of Standards and Technology (NIST), Gaithersburg, MD, USA

<sup>3</sup> W.M. Keck Laboratory for Structural Biology, University of Maryland Institute for Bioscience and Biotechnology Research, Rockville, MD, USA

<sup>4</sup> Laboratory of Clinical Investigation, National Institute on Aging, NIH, Baltimore, MD, USA

<sup>5</sup> Computational Biology and Genomics Core, Laboratory of Genetics and Genomics, National Institute on Aging, NIH, Baltimore, MD, USA

<sup>6</sup> Translational Gerontology Branch, National Institute on Aging, NIH, Baltimore, MD, USA

<sup>7</sup> Diagnologix LLC, San Diego, CA, USA

<sup>8</sup> Elixirgen Therapeutics, Inc. MD, USA

<sup>9</sup> Laboratory of Behavioral Neuroscience, National Institute on Aging, NIH, Baltimore, MD, USA

<sup>10</sup> Laboratory of Epidemiology & Population Sciences, National Institute on Aging, NIH, Baltimore, MD, USA

<sup>11</sup> Facility for Biotechnology Resources, CBER, Food and Drug Administration, Silver Spring, MD, USA

<sup>12</sup> NIH Tetramer Core Facility at Emory University, Atlanta, GA, USA

\* These authors contributed equally.

# Correspondence to Nan-ping Weng, Wengn@nih.gov

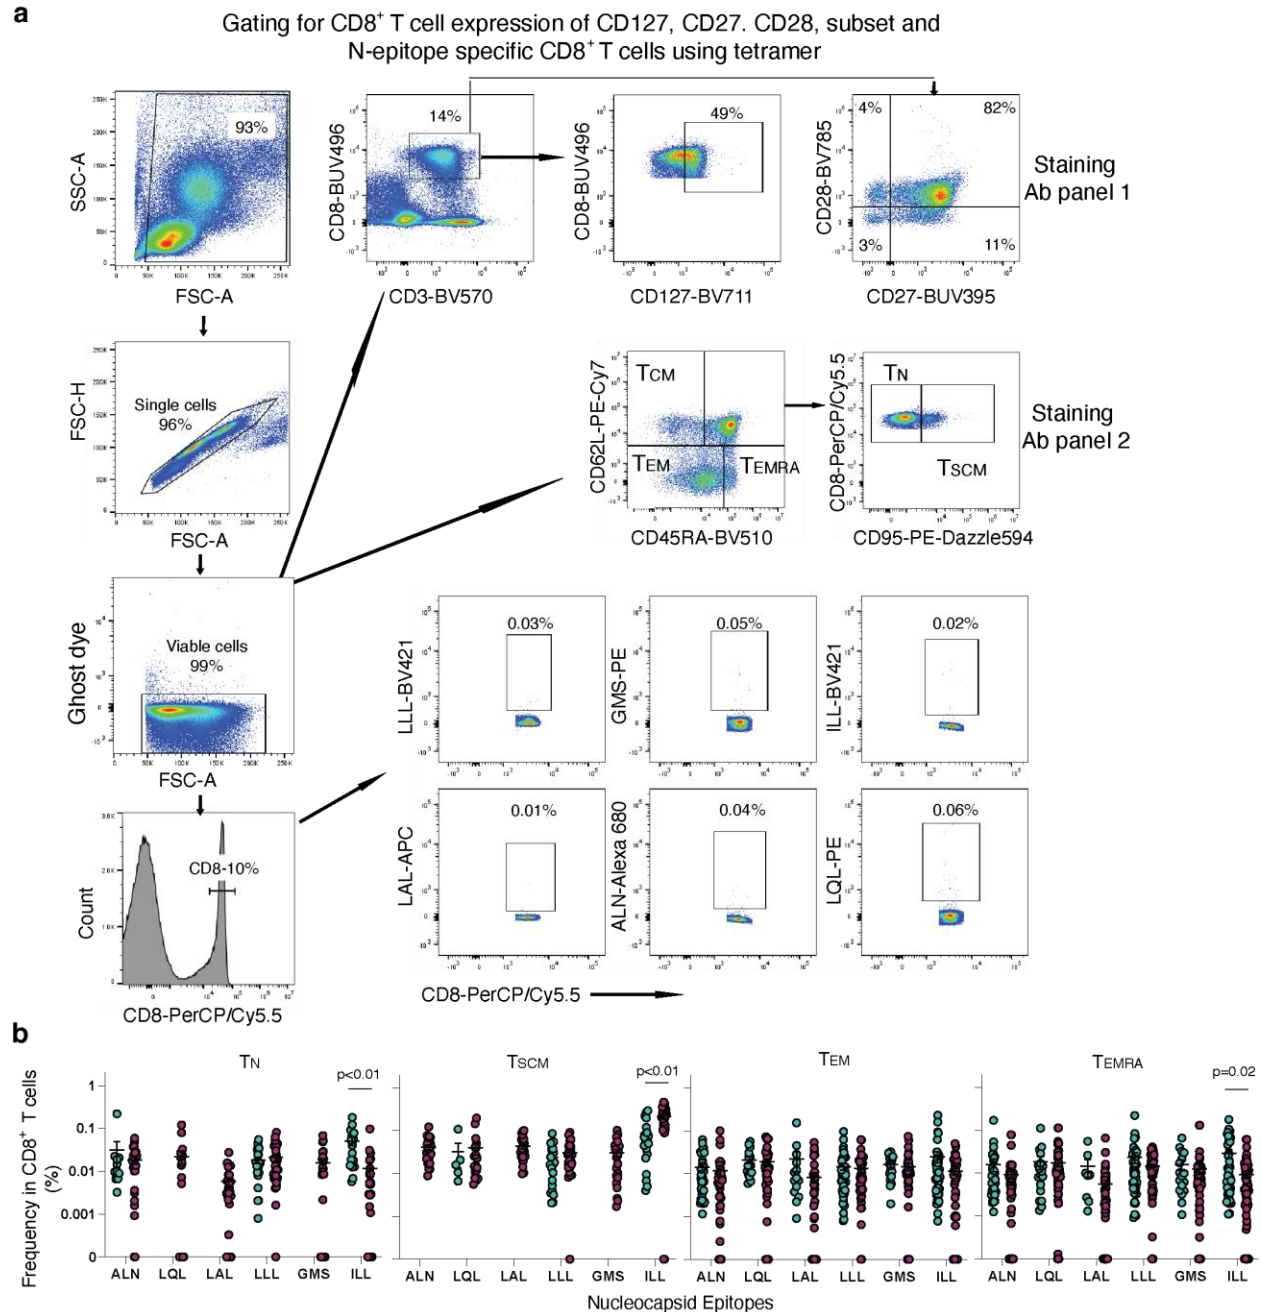

**Supplementary Figure 1. Gating strategies for flow cytometry analysis of CD8<sup>+</sup> T cells and CD8<sup>+</sup> T cell subsets specific for six SARS-CoV-2 nucleocapsid epitopes. a.** Gating strategies for CD8<sup>+</sup> T cell and its five subsets: Naïve (T<sub>N</sub>), memory stem cell (T<sub>SCM</sub>), central (T<sub>CM</sub>) and effector (T<sub>EM</sub>) memory cells, and effector memory cells expressing CD45RA (T<sub>EMRA</sub>) for six nucleocapsid epitopes by stained by the specific tetramers, and for CD127, CD27 and CD28. **b.** Frequencies of four subsets of CD8<sup>+</sup> T cells that recognizes six nucleocapsid epitopes in convalescence and uninfected donors (Convalescent=35, Uninfected=80). Two-tailed T-test adjusted for age and sex was carried out for all comparisons between convalescent and uninfected donor. p value, mean and SEM are shown.

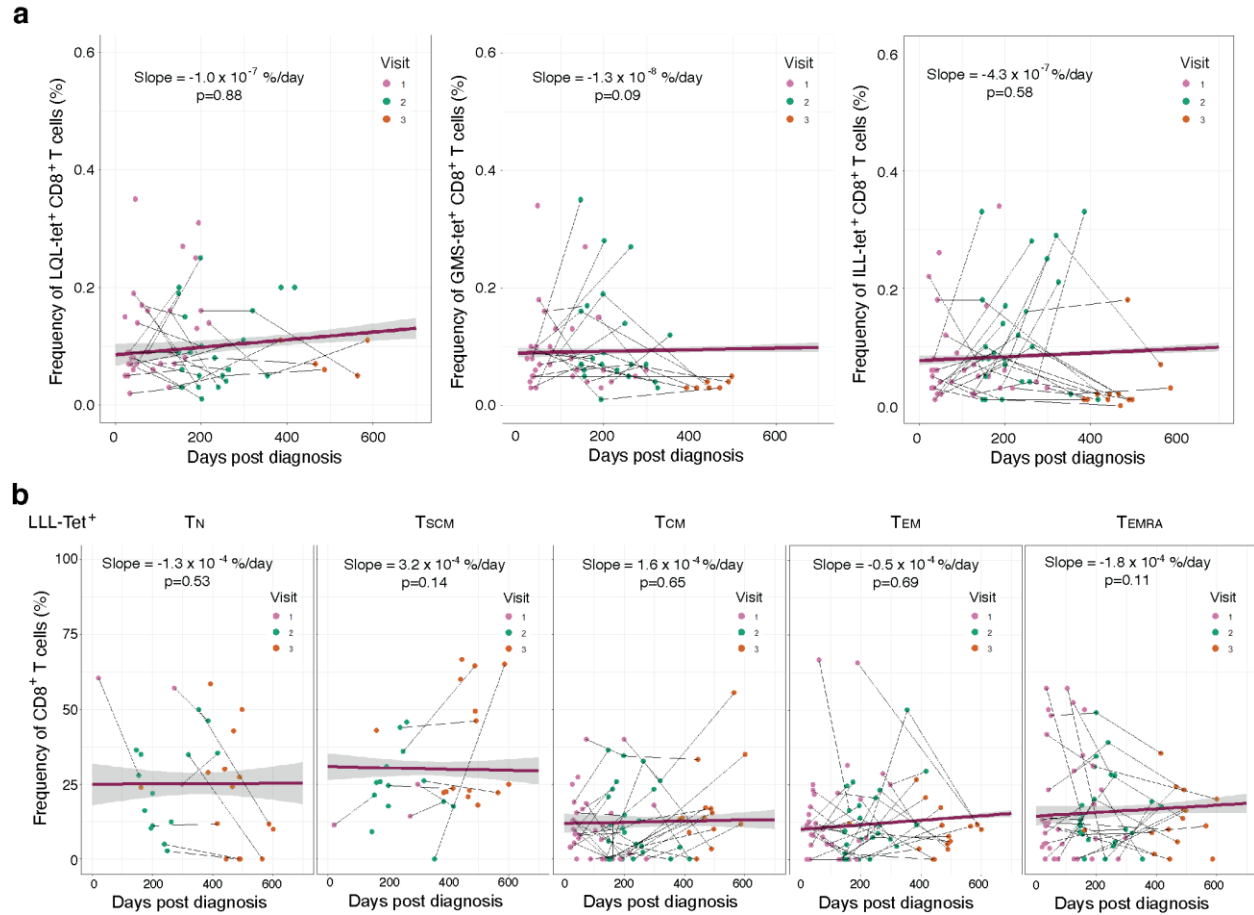

**Supplementary Figure 2. Frequencies of CD8<sup>+</sup> T cells recognizing N nucleocapsid change over time in convalescent patients.** **a.** Frequency of tetramer positive (LQL, GMS, and ILL) CD8<sup>+</sup> T cells at multiple time points (pink=visit 1, green=visit 2, orange=visit 3). Multiple visits for a single subject are connected by thin black lines. The overall trend line (purple) across time points for each subject were generated by the mixed effect linear regression model (adjusted for age and sex) with error bounds indicating a 95% confidence interval (light grey) for the convalescent cohort, n=75. **b.** Frequencies of LLL-tetramer positive CD8<sup>+</sup> T cell subsets over time.

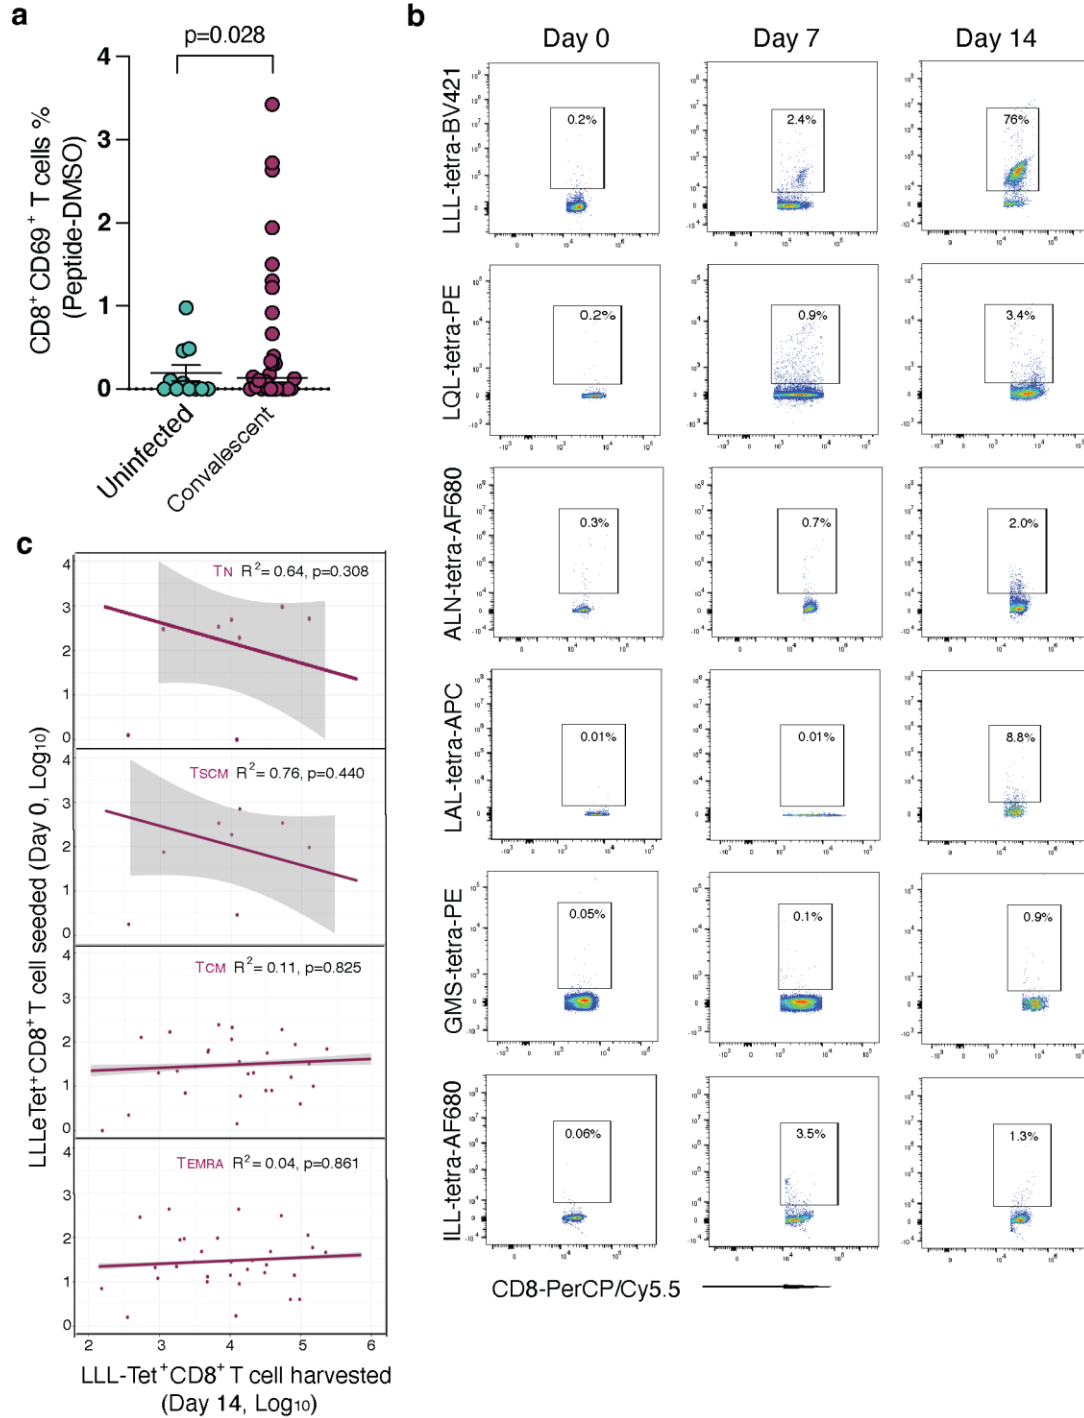

**Supplementary Figure 3. Functional assessment of the ability for *in vitro* expansion of SARS-CoV-2 nucleocapsid-specific CD8<sup>+</sup> T cells.** **a.** Flow cytometry analysis of CD8<sup>+</sup>CD69<sup>+</sup> T cells after peptide stimulation overnight. Convalescent patients=30 and uninfected donor=11.  $p$  value, mean and SEM are shown. **b.** Representative flow gating of six nucleocapsid specific CD8<sup>+</sup> T cells prior (Day 0) and post (Day 7 and 14) *in vitro* peptide stimulation. **c.** Correlation between seeding LLL-Tet<sup>+</sup> CD8<sup>+</sup> T cell subset counts on day 0 and harvested LLL-Tet<sup>+</sup> CD8<sup>+</sup> T cell counts after stimulation. Values were log<sub>10</sub> transformed and a linear regression was generated comparing the correlations of day 0 and day 14 with error bounds indicating a 95% confidence interval (light grey). Two-tailed T-test adjusted for age and sex was carried out for all comparisons between convalescent and uninfected donor.  $p$  value,  $R^2$  value, and SEM are shown.

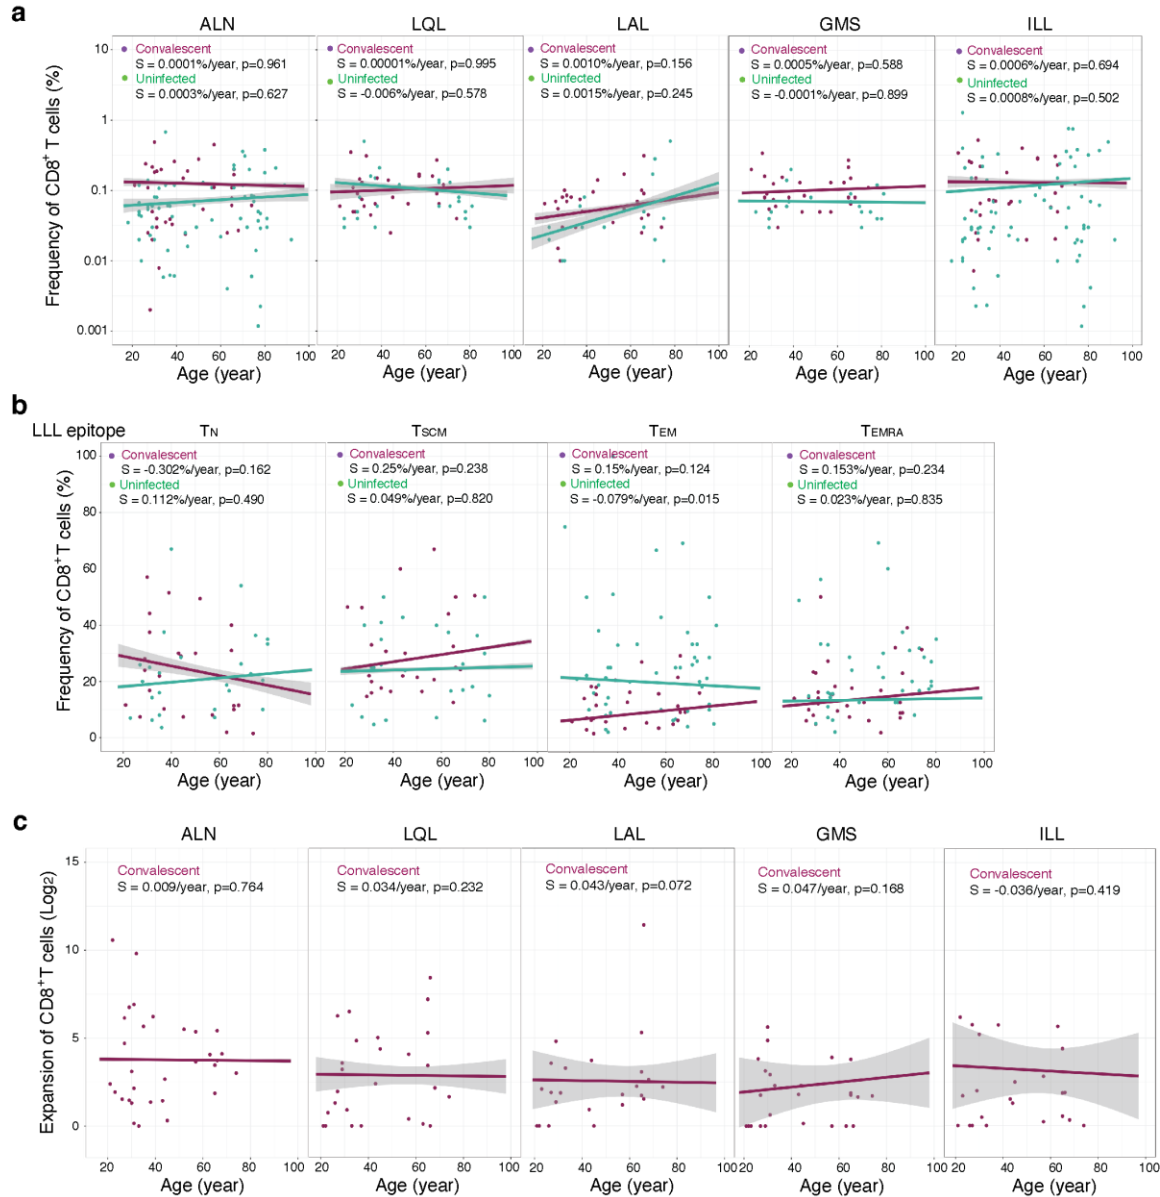

**Supplementary Figure 4. Age-associated changes in nucleocapsid specific CD8<sup>+</sup> T cells in uninfected and convalescent donor.** **a.** Correlation between frequency of five nucleocapsid epitope-specific CD8<sup>+</sup> T cells and donor's age. For donors with multiple visits, the frequencies were averaged and depicted as a single point. Purple line represents convalescent donors and green line represent uninfected donors, and they were generated using a linear regression model adjusted with sex with error bounds indicating a 95% confidence interval (light grey) (Convalescent=34, Uninfected=57). **b.** Correlation between frequency of LLL-Tet<sup>+</sup> CD8<sup>+</sup> T cell subsets and donor's age. For donors with multiple visits, the frequencies were averaged and depicted as a single point. Purple line represents convalescent donors and green line represent uninfected donors, and they were generated using a linear regression model adjusted with sex with error bounds indicating a 95% confidence interval (light grey) (Convalescent=34, Uninfected=57). **c.** Correlation between degree of nucleocapsid-specific CD8<sup>+</sup> T cell expansion and convalescent donor's age (n=35).

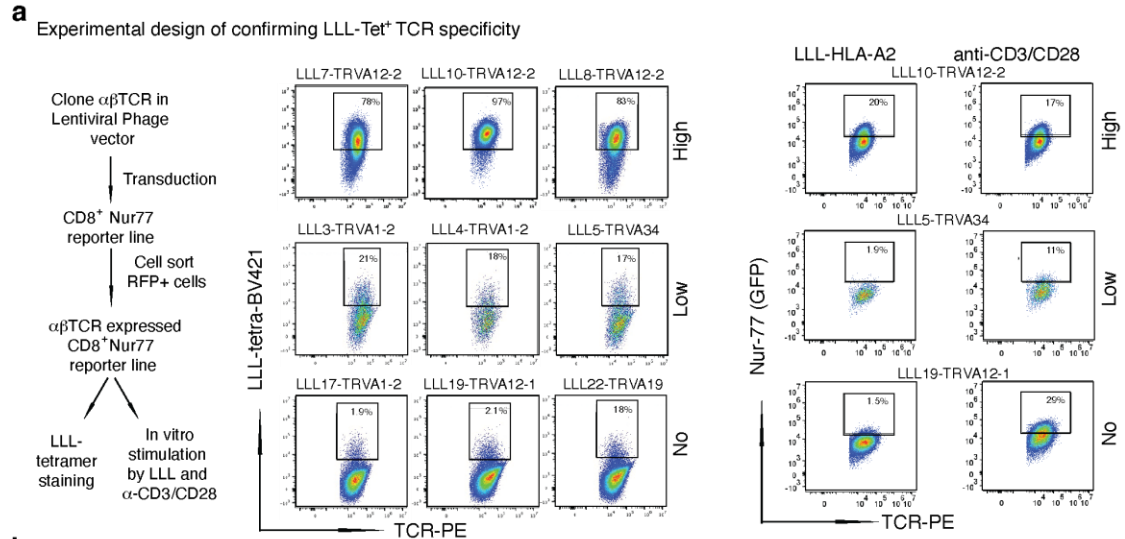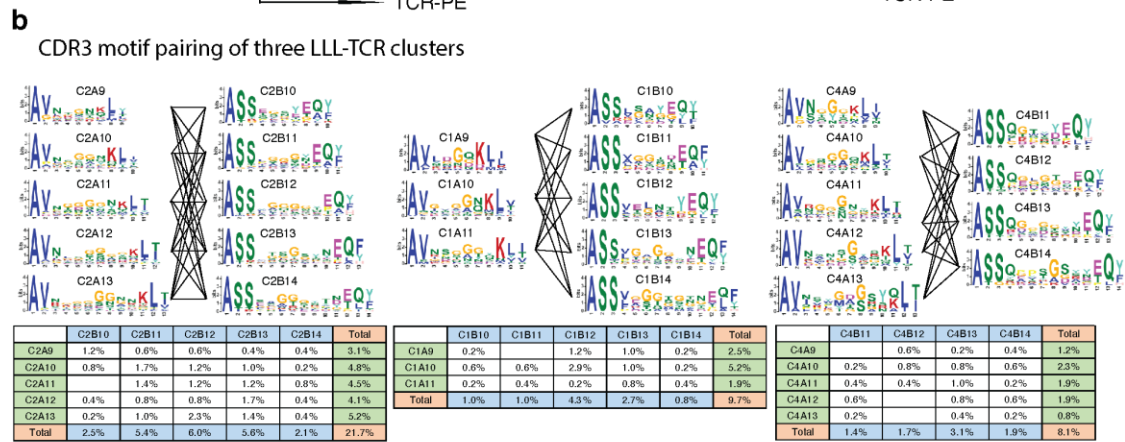

**c** Diagram of machine learning RF model

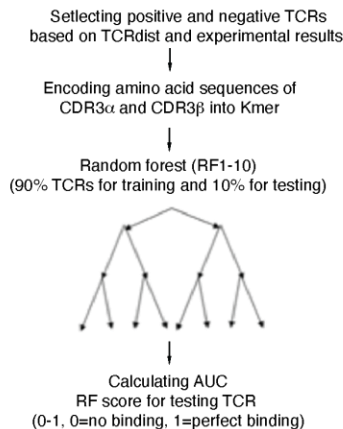

**d** Top most influenced kmers

| Chain | kmer | Location | Contribution | Model used |
|-------|------|----------|--------------|------------|
| alpha | AVN  | L-End    | 0.76%        | 7          |
| alpha | AVK  | L-End    | 0.73%        | 2          |
| alpha | KLI  | R-End    | 0.49%        | 1          |
| alpha | NYQ  | Center   | 0.32%        | 3          |
| alpha | GYS  | Center   | 0.24%        | 4          |
| beta  | ASS  | L-End    | 0.68%        | 5          |
| beta  | TQY  | R-End    | 0.49%        | 1          |
| beta  | EQY  | R-End    | 0.40%        | 3          |
| beta  | GQG  | Center   | 0.36%        | 2          |
| beta  | SSG  | L-Side   | 0.24%        | 4          |

**Supplementary Figure 5. Analysis of LLL<sup>+</sup> specific TCRs. A. Experimental design for confirmation of LLL-binding specificity. a** Diagram of experimental steps for introducing TCR to NJ76-CD8 (Nur77 reporter) cells. Representative flow graphs of high, low and no tetramer bindings, as well as of GFP reporter activity after 4-hour stimulation with either LLL-HLA-A2/antiCD28 or antiCD3/antiCD28. **b.** CDR3 motifs of LLL<sup>+</sup> TCRs of three clusters. **c.** Diagram of machine learning steps. **d.** Information of top 5 kmers with highest perturbation score that has most influenced on RF score (presented as percentage) and number of models displayed perturbation.

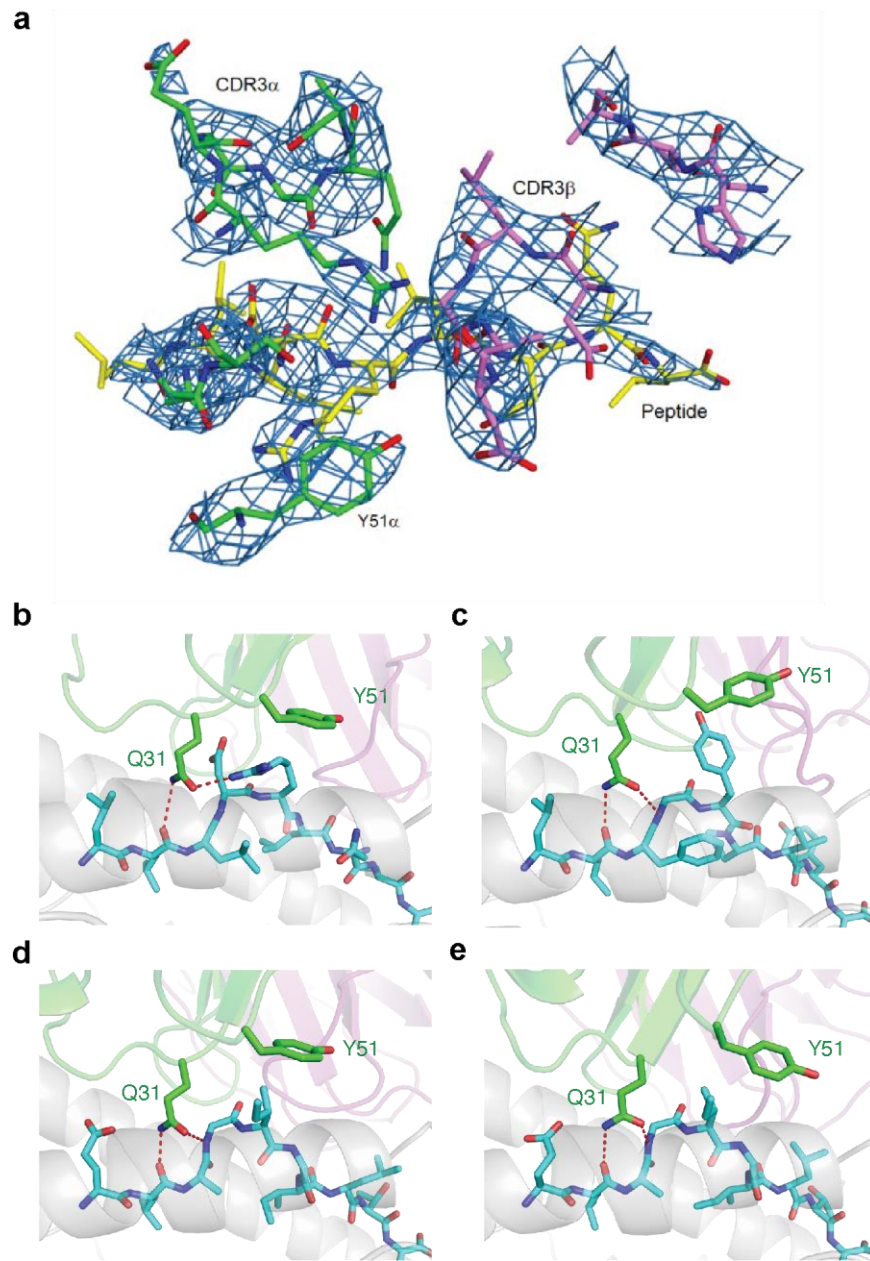

**Supplementary Figure 6. Electron density in the interface of the LLL8-LLL-HLA-A2 complex and shared pMHC engagement by TRAV12-2 TCRs.** **a.** Density from the final  $2F_o - F_c$  map at 3.18 Å resolution is contoured at 1.2  $\sigma$ . TCRs: **b.** LLL8, **c.** A6, **d.** DMF5, and **e.** Mel5 are shown in complex with respective target peptide and HLA-A2 MHC. A6, DMF5, and Mel5 TCR-pMHC complexes are from PDB entries 1AO7, 3QDG, and 3HG1, respectively. All complexes are shown in a common reference frame based on MHC helices, with MHC shown as gray cartoon, peptide as cyan sticks, TCR a chain as green cartoon, and TCR  $\beta$  chain as magenta cartoon. LLL8 residues Q31a and Y51a and equivalent residues in other TCRs are shown as sticks, all labeled by LLL8 TCR numbering for clarity. Dashed red lines denote hydrogen bonds between Q31a and peptide backbone atoms, with additional Q31a-peptide side chain hydrogen bond shown for TCR LLL8.

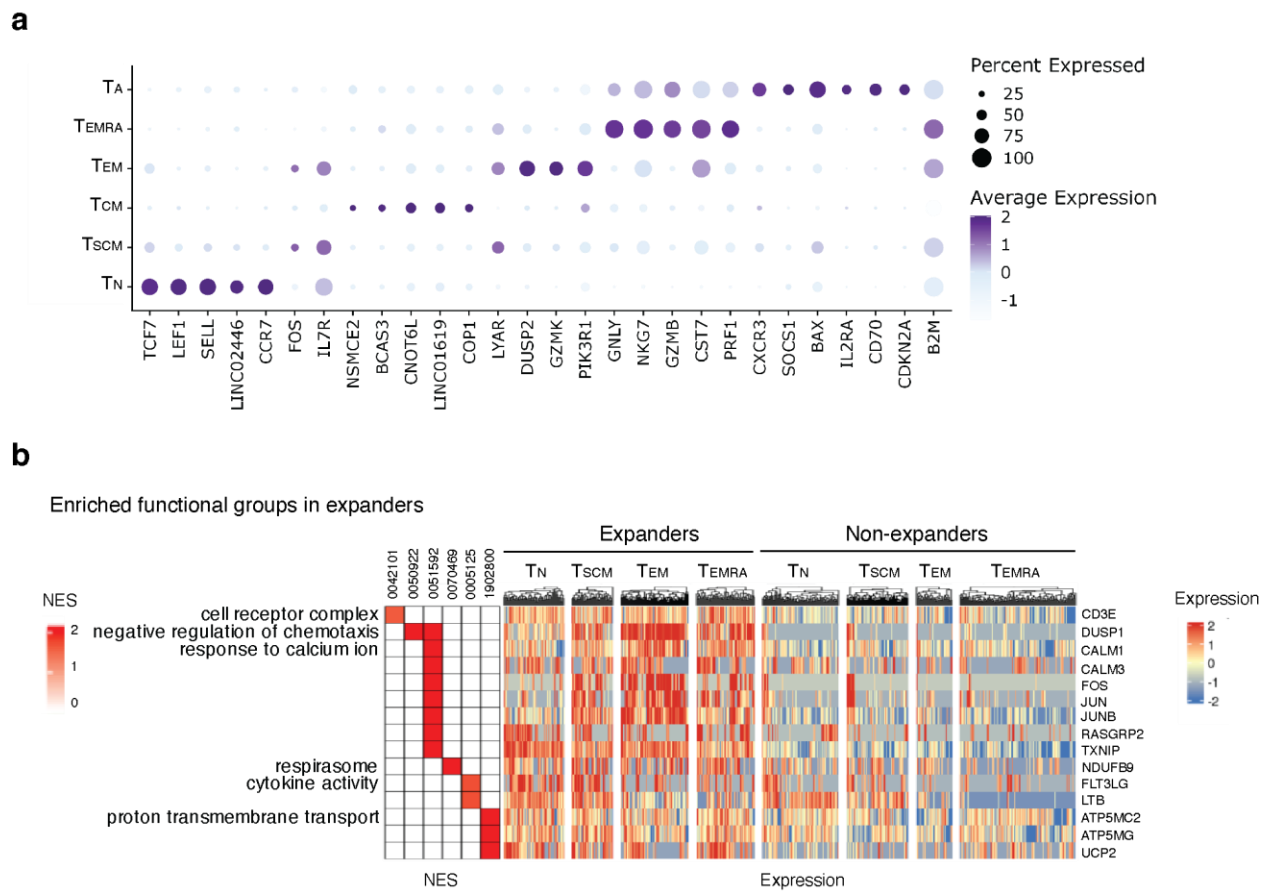

**Supplementary Figure 7. Differentially expressed genes that define the six subsets of CD8<sup>+</sup> T cells and enriched functional groups of genes in CD8<sup>+</sup> T cells from the expanders. a.** Differentially expressed genes in each of six subsets of CD8<sup>+</sup> T cells. **b.** Enriched expressed genes in CD8<sup>+</sup> T cells and subsets of expanders heatmap of selected enriched genes of freshly isolated CD8<sup>+</sup> T cells of expanders compared to non-expanders. NES=Normalized enrichment score.



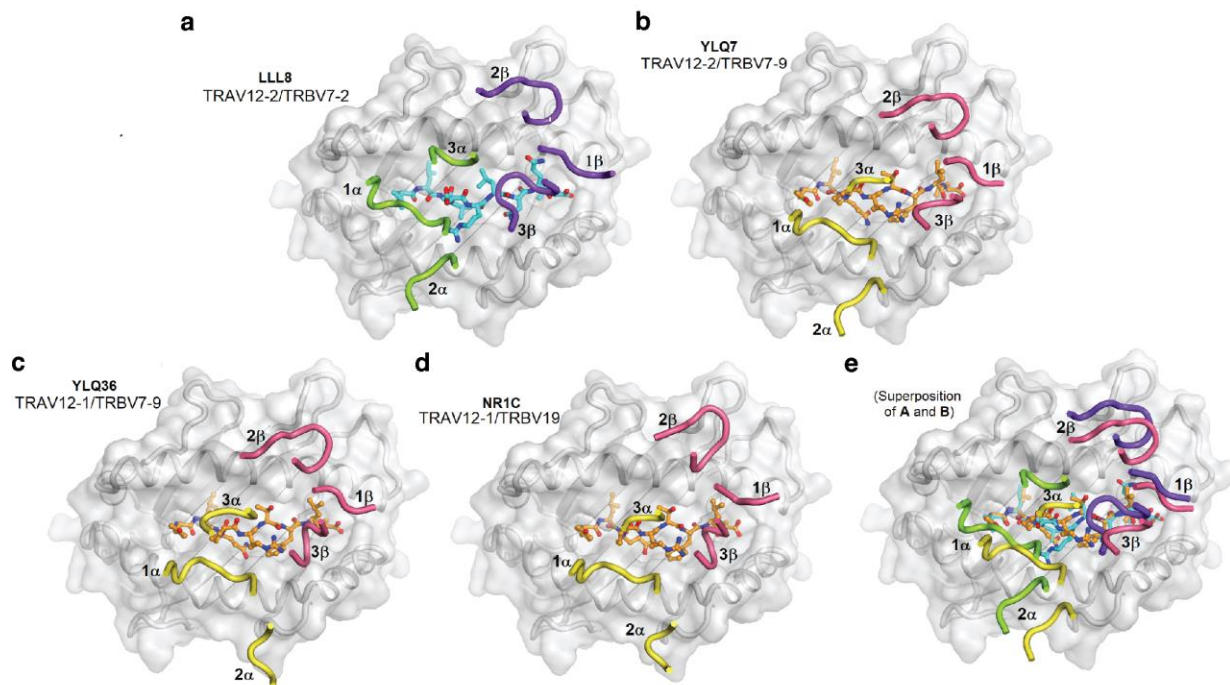

**Supplementary Figure 8. Comparison of docking topologies of SARS-CoV-2-specific TCRs.**

Top views of TCR–pMHC complexes featuring SARS-CoV-2 epitopes presented by HLA-A2 and TCRs that use germline genes TRAV12-1 and TRAV12-2. **a.** The LLL8–LLL–HLA-A2 complex, with the LLL epitope from the nucleocapsid protein shown in cyan and the CDR loops in green and purple. The gene usage of this TCR is given in the inset, TRAV12-2 and TRBV7-2. **b.** The YLQ7–YLQ–HLA-A2 complex (PDB code 7N1F). Gene usage: TRAV12-2/TRBV7-9. The spike epitope YLQ is colored orange, with the CDRs in yellow and pink. **c.** The YLQ36–YLQ–HLA-A2 complex (7PBE). Gene usage: TRAV12-1/TRBV7-9. **d.** The NR1C–YLQ–HLA-A2 complex (7N6E). Gene usage: TRAV12-1/TRBV19. **e.** Superposition of LLL8–LLL–HLA-A2 and YLQ7–YLQ–HLA-A2 for comparison of docking topologies.

**Supplementary Table 1. Comparison of six N protein epitopes between SARS-CoV-2 and four common cold coronaviruses**

| virus      | ALN                   |                               |
|------------|-----------------------|-------------------------------|
|            | sequence <sup>a</sup> | SARS-CoV-2 match <sup>b</sup> |
| SARS-CoV-2 | ALNTPKDHI             | 9                             |
| OC43       | DVNTPADIV             | 4                             |
| HKU1       | DTSTPSDVS             | 3                             |
| NL63       | AKTVNTSLG             | 1                             |
| 229E       | AKTEPTGYG             | 2                             |
|            | LQL                   |                               |
| SARS-CoV-2 | LQLPQGTTL             | 9                             |
| OC43       | TRFPPGTVL             | 4                             |
| HKU1       | TRFPPGTIL             | 4                             |
| NL63       | LEPKFSIAL             | 2                             |
| 229E       | EIPHFNQKL             | 1                             |
|            | LLL                   |                               |
| SARS-CoV-2 | LLDRLNQL              | 9                             |
| OC43       | LVLAKLGKD             | 3                             |
| HKU1       | LVLAKLGKD             | 3                             |
| NL63       | AVNLALKNL             | 2                             |
| 229E       | AVAAALKSL             | 2                             |
|            | LAL                   |                               |
| SARS-CoV-2 | LALLLDRL              | 9                             |
| OC43       | IASLVLAKL             | 4                             |
| HKU1       | IANLVLAKL             | 4                             |
| NL63       | LVAAVNLAL             | 2                             |
| 229E       | IMKAVAAAL             | 1                             |
|            | GMS                   |                               |
| SARS-CoV-2 | GMSRIGMEV             | 9                             |
| OC43       | FGSKLELAK             | 1                             |
| HKU1       | FGSKLDLVK             | 1                             |
| NL63       | FDSEVSTEE             | 2                             |
| 229E       | FDSHIVSKE             | 2                             |
|            | ILL                   |                               |
| SARS-CoV-2 | ILLNKHIDA             | 9                             |
| OC43       | KVLSENLNA             | 2                             |
| HKU1       | KVLEENLNA             | 2                             |
| NL63       | PKFIEQISA             | 2                             |
| 229E       | EELNAFTRE             | 2                             |

<sup>a</sup>N protein sequences for coronaviruses OC43, HKU1, NL63, and 229E were obtained from NCBI Genbank (Accession QXL74890.1, YP\_173242.1, ABK63972.1, and AGW80953.1) and aligned with SARS-CoV-2 N protein using MAFFT software<sup>1</sup>. Sequences shown represent residues aligned to SARS-CoV-2 epitope. In cases of gaps in epitope alignment, sequences were realigned using local pairwise ungapped alignment.

<sup>b</sup>Number of residues identical with SARS-CoV-2 epitope residues.

#### Reference

**Supplementary Table 2: Summary of *in vitro* stimulated LLL-Tet<sup>+</sup> CD8<sup>+</sup> T cells**

| Category             | Donor ID | Visit | Expansion (Log2) | LLL+ at D14 | Degree of expansion |
|----------------------|----------|-------|------------------|-------------|---------------------|
| Convalescent         | C006     | 2     | 5.32             | 0.4%        | Mild Expansion      |
| Convalescent         | C009     | 2     | 5.34             | 0.6%        | Robust expansion    |
| Convalescent         | C009     | 3     | 3.78             | 0.3%        | Mild Expansion      |
| Convalescent         | C014     | 1     | 2.47             | 0.0%        | Mild expansion      |
| Convalescent         | C014     | 2     | 7.08             | 1.1%        | Robust Expansion    |
| Convalescent         | C014     | 3     | 3.97             | 0.2%        | Mild Expansion      |
| Convalescent         | C016     | 2     | 4.73             | 0.2%        | Mild Expansion      |
| Convalescent         | C016     | 3     | 10.84            | 2.5%        | Robust Expansion    |
| Convalescent+Vaccine | C020     | 2     | 7.80             | 0.9%        | Robust Expansion    |
| Convalescent+Vaccine | C020     | 3     | 3.85             | 0.9%        | Robust expansion    |
| Convalescent+Vaccine | C021     | 3     | 4.81             | 0.8%        | Robust Expansion    |
| Convalescent         | C023     | 1     | 6.48             | 5.0%        | Robust expansion    |
| Convalescent         | C024     | 1     | 3.62             | 2.1%        | Robust expansion    |
| Convalescent         | C025     | 2     | 7.50             | 0.3%        | Mild Expansion      |
| Convalescent         | C025     | 3     | 2.15             | 0.6%        | Mild Expansion      |
| Convalescent         | C026     | 1     | 8.74             | 11.0%       | Robust Expansion    |
| Convalescent         | C026     | 2     | 0.57             | 0.1%        | No Expansion        |
| Convalescent         | C027     | 2     | 3.10             | 4.1%        | Robust Expansion    |
| Convalescent         | C029     | 1     | 10.26            | 31.6%       | Robust Expansion    |
| Convalescent         | C029     | 2     | 1.63             | 1.8%        | Mild expansion      |
| Convalescent         | C029     | 3     | 7.56             | 1.9%        | Robust Expansion    |
| Convalescent+Vaccine | C030     | 1     | 9.21             | 18.2%       | Robust Expansion    |
| Convalescent+Vaccine | C030     | 2     | 2.36             | 0.3%        | Mild Expansion      |
| Convalescent+Vaccine | C030     | 3     | 11.06            | 8.8%        | Robust Expansion    |
| Convalescent         | C031     | 1     | 9.41             | 10.9%       | Robust Expansion    |
| Convalescent         | C031     | 2     | 3.99             | 0.5%        | Mild Expansion      |
| Convalescent         | C034     | 1     | 8.38             | 7.9%        | Robust expansion    |
| Convalescent         | C034     | 2     | 3.40             | 0.1%        | Mild Expansion      |
| Convalescent         | C037     | 1     | 5.78             | 0.8%        | Robust Expansion    |
| Convalescent         | C037     | 2     | 0.76             | 0.1%        | No Expansion        |
| Convalescent         | C037     | 3     | 3.67             | 0.4%        | Mild Expansion      |
| Convalescent         | C038     | 1     | 4.19             | 0.9%        | Robust Expansion    |
| Convalescent         | C038     | 2     | 0.00             | 0.1%        | No Expansion        |
| Convalescent         | C039     | 1     | 7.21             | 3.2%        | Robust Expansion    |
| Convalescent         | C039     | 2     | 8.82             | 5.6%        | Robust Expansion    |
| Convalescent+Vaccine | C040     | 1     | 6.94             | 4.8%        | Robust Expansion    |
| Convalescent         | C040     | 2     | 5.88             | 7.5%        | Robust Expansion    |
| Convalescent         | C042     | 1     | 8.44             | 4.4%        | Robust Expansion    |
| Convalescent         | C042     | 2     | 12.47            | 71.3%       | Robust Expansion    |
| Convalescent         | C042     | 3     | 9.72             | 2.9%        | Robust Expansion    |
| Convalescent         | C043     | 1     | 2.61             | 0.1%        | Mild expansion      |
| Convalescent         | C044     | 1     | 7.21             | 0.3%        | Mild Expansion      |
| Convalescent         | C045     | 1     | 3.82             | 0.2%        | Mild Expansion      |
| Convalescent+Vaccine | C046     | 1     | 11.62            | 44.7%       | Robust Expansion    |
| Convalescent+Vaccine | C046     | 2     | 4.89             | 18.6%       | Robust Expansion    |
| Convalescent         | C052     | 1     | 2.57             | 0.6%        | Mild Expansion      |
| Convalescent         | C052     | 2     | 0.99             | 0.4%        | No Expansion        |
| Convalescent         | C052     | 3     | 5.77             | 0.3%        | Robust expansion    |
| Convalescent         | C054     | 1     | 4.35             | 0.2%        | Robust expansion    |
| Convalescent         | C054     | 2     | 0.00             | 0.3%        | No expansion        |
| Convalescent         | C055     | 1     | 0.00             | 0.0%        | No expansion        |
| Convalescent         | C062     | 1     | 6.96             | 4.8%        | Robust Expansion    |
| Convalescent+Vaccine | C063     | 1     | 1.31             | 0.4%        | Mild expansion      |
| Convalescent         | C063     | 2     | 0.00             | 0.0%        | No expansion        |
| Convalescent         | C066     | 1     | 10.11            | 20.8%       | Robust Expansion    |

|                      |      |   |       |       |                  |
|----------------------|------|---|-------|-------|------------------|
| Convalescent+Vaccine | C070 | 1 | 0.78  | 0.9%  | No Expansion     |
| Convalescent+Vaccine | C070 | 3 | 4.97  | 1.0%  | Robust expansion |
| Convalescent         | C072 | 1 | 0.00  | 0.1%  | No Expansion     |
| Convalescent         | C074 | 1 | 1.82  | 0.3%  | Mild expansion   |
| Convalescent         | C074 | 2 | 2.55  | 0.2%  | Mild expansion   |
| Convalescent         | C074 | 3 | 4.04  | 0.8%  | Robust Expansion |
| Convalescent         | C079 | 1 | 7.23  | 18.4% | Robust Expansion |
| Convalescent         | C079 | 2 | 8.57  | 4.0%  | Robust Expansion |
| Convalescent         | C080 | 1 | 2.31  | 0.8%  | Mild Expansion   |
| Convalescent         | C081 | 1 | 1.09  | 0.4%  | Mild Expansion   |
| Convalescent         | C081 | 2 | 10.86 | 19.8% | Robust Expansion |
| Uninfected           | U001 | 1 | 1.03  | 0.5%  | Mild Expansion   |
| Uninfected           | U002 | 1 | 0.20  | 0.3%  | No Expansion     |
| Uninfected           | U003 | 1 | 0.16  | 0.5%  | No Expansion     |
| Uninfected           | U006 | 1 | 2.37  | 0.0%  | Mild expansion   |
| Uninfected           | U019 | 1 | 12.47 | 71.3% | Robust expansion |
| Uninfected           | U029 | 1 | 0.00  | 0.1%  | No expansion     |
| Uninfected           | U034 | 1 | 2.89  | 0.0%  | Mild Expansion   |
| Uninfected           | U042 | 1 | 0.00  | 0.2%  | No Expansion     |
| Uninfected           | U047 | 1 | 0.00  | 0.1%  | No Expansion     |
| Uninfected           | U048 | 1 | 0.00  | 0.1%  | No Expansion     |
| Uninfected           | U049 | 1 | 0.00  | 0.2%  | No Expansion     |
| Uninfected           | U051 | 1 | 0.00  | 0.1%  | No expansion     |
| Uninfected           | U055 | 1 | 0.00  | 0.1%  | No Expansion     |
| Uninfected           | U056 | 1 | 5.98  | 0.1%  | Mild Expansion   |
| Uninfected           | U057 | 1 | 2.25  | 0.2%  | Mild expansion   |
| Uninfected           | U058 | 1 | 7.02  | 0.2%  | Mild Expansion   |
| Uninfected           | U060 | 1 | 6.95  | 0.6%  | Robust expansion |
| Uninfected           | U063 | 1 | 2.27  | 0.0%  | Mild expansion   |
| Uninfected           | U065 | 1 | 7.08  | 1.1%  | Robust expansion |
| Uninfected           | U066 | 1 | 5.00  | 0.2%  | Mild Expansion   |
| Uninfected           | U072 | 1 | 3.05  | 0.2%  | Mild Expansion   |
| Uninfected           | U073 | 1 | 0.25  | 0.2%  | No expansion     |
| Uninfected           | U074 | 1 | 5.82  | 7.2%  | Robust expansion |
| Uninfected           | U075 | 1 | 0.00  | 0.1%  | No expansion     |
| Uninfected           | U090 | 1 | 0.00  | 0.7%  | No expansion     |
| Uninfected           | U094 | 1 | 2.89  | 0.0%  | Mild expansion   |
| Uninfected           | U095 | 1 | 1.69  | 0.1%  | Mild expansion   |
| Uninfected           | U119 | 1 | 2.87  | 0.4%  | Mild Expansion   |
| Uninfected           | U120 | 1 | 4.79  | 0.5%  | Robust expansion |
| Uninfected           | U121 | 1 | 3.22  | 0.8%  | Robust expansion |
| Uninfected           | U122 | 1 | 3.21  | 1.0%  | Robust Expansion |
| Uninfected           | U124 | 1 | 1.59  | 0.8%  | Mild Expansion   |
| Uninfected           | U126 | 1 | 3.66  | 0.2%  | Mild Expansion   |
| Uninfected           | U128 | 1 | 0.00  | 0.1%  | No Expansion     |
| Uninfected           | U129 | 1 | 0.00  | 0.1%  | No Expansion     |
| Uninfected           | U130 | 1 | 0.00  | 0.3%  | No Expansion     |
| Uninfected           | U131 | 1 | 0.00  | 0.0%  | No Expansion     |
| Uninfected           | U132 | 1 | 0.00  | 0.2%  | No expansion     |
| Uninfected           | U134 | 1 | 0.00  | 0.2%  | No Expansion     |
| Uninfected           | U135 | 1 | 0.00  | 0.0%  | No Expansion     |
| Uninfected           | U136 | 1 | 0.00  | 0.1%  | No Expansion     |
| Uninfected           | U137 | 1 | 2.69  | 0.2%  | Mild Expansion   |
| Uninfected           | U138 | 1 | 0.00  | 0.3%  | No Expansion     |

**Supplementary Table 3. Data collection and refinement statistics**

|                                             |                                               |
|---------------------------------------------|-----------------------------------------------|
| PDB accession code                          | 8DNT                                          |
| <b>Data collection</b>                      |                                               |
| Resolution range (Å) <sup>a</sup>           | 48.7–3.11 (3.19–3.11)                         |
| Space group                                 | C121                                          |
| Unit cell parameters                        | 182.2 Å, 121.8 Å, 210.6 Å<br>90°, 100.0°, 90° |
| Total reflections <sup>a</sup>              | 163,220 (4,296)                               |
| Unique reflections <sup>a</sup>             | 64,385 (2,708)                                |
| Multiplicity                                | 2.5 (1.6)                                     |
| Completeness (%) <sup>a</sup>               | 79.2 (45.5)                                   |
| Mean $I/\sigma(I)$                          | 8.0 (0.4)                                     |
| Wilson $B$ factor (Å <sup>2</sup> )         | 107.6                                         |
| $R_{\text{merge}}$ <sup>a,b</sup>           | 0.097 (1.381)                                 |
| $CC_{1/2}$ <sup>a</sup>                     | 0.997 (0.249)                                 |
| <b>Refinement</b>                           |                                               |
| Resolution range (Å)                        | 30.0–3.18 (3.26–3.18)                         |
| Reflections used in refinement <sup>a</sup> | 54,229 (2,345)                                |
| $R_{\text{work}}$ <sup>a,c</sup>            | 0.221 (0.344)                                 |
| $R_{\text{free}}$ <sup>a,c</sup>            | 0.313 (0.431)                                 |
| No. of protein atoms                        | 26,210                                        |
| No. of waters                               | 0                                             |
| Protein residues                            | 3,300                                         |
| r.m.s.d. from ideality                      |                                               |
| Bond lengths (Å)                            | 0.002                                         |
| Bond angles (°)                             | 0.831                                         |
| Ramachandran plot statistics                |                                               |
| Favored (%)                                 | 85.3                                          |
| Allowed (%)                                 | 12.5                                          |
| Disallowed (%)                              | 2.2                                           |
| Rotamer outliers (%)                        | 9.1                                           |
| Clashscore                                  | 10.0                                          |
| Average $B$ factor (Å <sup>2</sup> )        | 155.0                                         |

<sup>a</sup>Values in parentheses correspond to the highest resolution shell.

<sup>b</sup> $R_{\text{merge}} = \sum |I_j - \langle I \rangle| / \sum I_j$ , where  $I_j$  is the intensity of an individual reflection and  $\langle I \rangle$  is the average intensity of that reflection.

<sup>c</sup> $R_{\text{work}} (R_{\text{free}}) = \sum ||F_o| - |F_c|| / \sum |F_o|$ ; 5.0% of data were used for  $R_{\text{free}}$ .

**Supplementary Table 4. Interactions between TCR LLL8 and HLA-A2**

| HLA-A2     | TCR LLL8                                                                                                                                 |                                                                                                                |
|------------|------------------------------------------------------------------------------------------------------------------------------------------|----------------------------------------------------------------------------------------------------------------|
|            | Hydrogen bonds                                                                                                                           | Van der Waals contacts                                                                                         |
| $\alpha 1$ |                                                                                                                                          |                                                                                                                |
| E58H       |                                                                                                                                          | D27 $\alpha$ (1)                                                                                               |
| G62H       |                                                                                                                                          | G94 $\alpha$ (1)                                                                                               |
| R65H       | Q96 $\alpha$ (O) - R65H(N $\eta$ 1)<br>Q96 $\alpha$ (O) - R65H(N $\eta$ 2)<br>Y48 $\beta$ (OH) - R65H(N $\eta$ 2)                        | E93 $\alpha$ (1), G94 $\alpha$ (3), A95 $\alpha$ (2),<br>Q96 $\alpha$ (5), K97 $\alpha$ (2)<br>Y48 $\beta$ (6) |
| K66H       |                                                                                                                                          | Q31 $\alpha$ (1), G94 $\alpha$ (6), A95 $\alpha$ (7)                                                           |
| A69H       |                                                                                                                                          | A95 $\alpha$ (1)<br>Y48 $\beta$ (1)                                                                            |
| Q72H       | Y48 $\beta$ (OH) - Q72H(N $\epsilon$ 2)<br>Q50 $\beta$ (O $\epsilon$ 1) - Q72H(N $\epsilon$ 2)<br>Q50 $\beta$ (N $\epsilon$ 2) - Q72H(O) | Y48 $\beta$ (2), Q50 $\beta$ (9), P55 $\beta$ (5)                                                              |
| T73H       |                                                                                                                                          | Q50 $\beta$ (3), L98 $\beta$ (1)                                                                               |
| $\alpha 2$ |                                                                                                                                          |                                                                                                                |
| A150H      |                                                                                                                                          | D101 $\beta$ (3)                                                                                               |
| Q155H      |                                                                                                                                          | Y51 $\alpha$ (3)                                                                                               |
| A158H      |                                                                                                                                          | S52 $\alpha$ (2)                                                                                               |
| Y159H      |                                                                                                                                          | Q31 $\alpha$ (2)                                                                                               |
| T163H      |                                                                                                                                          | Q31 $\alpha$ (3), K67 $\alpha$ (1)                                                                             |
| E166H      | R28 $\alpha$ (N $\eta$ 1) - Q166H(O $\epsilon$ 2)<br>R28 $\alpha$ (N $\eta$ 2) - Q166H(O $\epsilon$ 2)                                   | R28 $\alpha$ (7), K67 $\alpha$ (2)                                                                             |
| W167H      |                                                                                                                                          | K67 $\alpha$ (1)                                                                                               |
| R170H      |                                                                                                                                          | R28 $\alpha$ (3)                                                                                               |

Contact residues were identified with CONTACT (17). Hydrogen bonds were calculated using a cut-off distance of 3.5 Å. The cut-off distance for van der Waals contacts was 4.0 Å.

**Supplementary Table 5. Interactions TCR LLL8 and LLL peptide**

| LLL | TCR LLL8                                                                                                                         |                                                                                                              |
|-----|----------------------------------------------------------------------------------------------------------------------------------|--------------------------------------------------------------------------------------------------------------|
|     | Hydrogen bonds                                                                                                                   | Van der Waals contacts                                                                                       |
| L2p | Q31 $\alpha$ (N $\epsilon$ 2) - L2p(O)                                                                                           | Q31 $\alpha$ (1)                                                                                             |
| D4p | S32 $\alpha$ (N) - D4p(O $\delta$ 2)<br>S32 $\alpha$ (O $\gamma$ ) - D4p(O $\delta$ 2)<br>Q96 $\alpha$ (N $\epsilon$ 2) - D4p(O) | Q31 $\alpha$ (9), S32 $\alpha$ (4),<br>R92 $\alpha$ (2), A95 $\alpha$ (2), Q96 $\alpha$ (3)                  |
| R5p | Q31 $\alpha$ (O $\epsilon$ 1) - R5p(N $\eta$ 2)                                                                                  | Q31 $\alpha$ (5), S32 $\alpha$ (2), Y51 $\alpha$ (5),<br>R92 $\alpha$ (1), Q96 $\alpha$ (2), G99 $\beta$ (1) |
| L6p | G99 $\beta$ (N) - L6p(O)                                                                                                         | Q96 $\alpha$ (5), D97 $\beta$ (1), L98 $\beta$ (1), G99 $\beta$ (6)                                          |
| N7p |                                                                                                                                  | D97 $\beta$ (2)                                                                                              |
| Q8p | Q50 $\beta$ (N $\epsilon$ 2) - Q8p(O $\epsilon$ 1),<br>D97 $\beta$ (O $\delta$ 1) - Q8p(N)                                       | T30 $\beta$ (1), Q50 $\beta$ (1), D97 $\beta$ (2)                                                            |

Contact residues were identified with CONTACT (17). Hydrogen bonds were calculated using a cut-off distance of 3.5 Å. The cut-off distance for van der Waals contacts was 4.0 Å.

**Supplementary Table 6. Computational alanine scanning to identify binding hotspot peptide and MHC residues**

| <b>Mutation<sup>1</sup></b> | <b>Chain</b> | <b><math>\Delta\Delta G^2</math></b> |
|-----------------------------|--------------|--------------------------------------|
| E58A                        | MHC          | 0                                    |
| Y59A                        | MHC          | 0                                    |
| D61A                        | MHC          | 0.2                                  |
| G62A                        | MHC          | -0.1                                 |
| E63A                        | MHC          | 0                                    |
| R65A                        | MHC          | 0.2                                  |
| K66A                        | MHC          | 0.5                                  |
| V67A                        | MHC          | 0                                    |
| A69G                        | MHC          | 0.4                                  |
| H70A                        | MHC          | 0.2                                  |
| Q72A                        | MHC          | <b>1.9</b>                           |
| T73A                        | MHC          | -0.1                                 |
| H74A                        | MHC          | 0                                    |
| R75A                        | MHC          | 0.1                                  |
| V76A                        | MHC          | 0                                    |
| K146A                       | MHC          | 0                                    |
| W147A                       | MHC          | 0.3                                  |
| A149G                       | MHC          | 0                                    |
| A150G                       | MHC          | 0                                    |
| H151A                       | MHC          | 0                                    |
| V152A                       | MHC          | 0                                    |
| Q155A                       | MHC          | 0.6                                  |
| A158G                       | MHC          | 0.4                                  |
| Y159A                       | MHC          | 0.3                                  |
| T163A                       | MHC          | -0.1                                 |
| E166A                       | MHC          | -0.1                                 |
| W167A                       | MHC          | 0.2                                  |
| R170A                       | MHC          | 0                                    |
| L1A                         | peptide      | 0.3                                  |
| L2A                         | peptide      | 0                                    |
| L3A                         | peptide      | 0                                    |
| D4A                         | peptide      | <b>1.2</b>                           |
| R5A                         | peptide      | <b>1.3</b>                           |
| L6A                         | peptide      | 0.2                                  |
| N7A                         | peptide      | <b>1</b>                             |
| Q8A                         | peptide      | 0.7                                  |
| L9A                         | peptide      | 0                                    |

<sup>1</sup>Only peptide or MHC residues within 6 Å of LLL–HLA-A2 for the wild-type complex structure were mutated to alanine. Wild-type alanine residues were mutated to glycine.

<sup>2</sup> $\Delta\Delta G$  for alanine substitution, calculated by Rosetta. Values in bold are those with score  $\geq 0.8$  and reflect predicted binding hotspot residues for the interaction with the LLL8 TCR.



**Supplementary Table 7. Computational alanine scanning to identify binding hotspot TCR residues**

| <b>Mutation<sup>1</sup></b> | <b>Chain</b> | <b><math>\Delta\Delta G^2</math></b> |
|-----------------------------|--------------|--------------------------------------|
| D27A                        | $\alpha$     | 0.4                                  |
| R28A                        | $\alpha$     | 0                                    |
| S30A                        | $\alpha$     | 0                                    |
| Q31A                        | $\alpha$     | <b>1.2</b>                           |
| S32A                        | $\alpha$     | <b>0.9</b>                           |
| Y51A                        | $\alpha$     | <b>1.6</b>                           |
| S52A                        | $\alpha$     | -0.1                                 |
| K67A                        | $\alpha$     | -0.2                                 |
| R92A                        | $\alpha$     | 0.4                                  |
| E93A                        | $\alpha$     | 0                                    |
| A95G                        | $\alpha$     | <b>0.8</b>                           |
| Q96A                        | $\alpha$     | <b>1</b>                             |
| K97A                        | $\alpha$     | 0.1                                  |
| T30A                        | $\beta$      | 0.5                                  |
| Y48A                        | $\beta$      | 0.2                                  |
| Q50A                        | $\beta$      | <b>0.9</b>                           |
| S53A                        | $\beta$      | <b>0.8</b>                           |
| P55A                        | $\beta$      | 0.1                                  |
| D56A                        | $\beta$      | 0.1                                  |
| L96A                        | $\beta$      | 0                                    |
| D97A                        | $\beta$      | <b>2.5</b>                           |
| L98A                        | $\beta$      | 0.5                                  |
| A100G                       | $\beta$      | 0                                    |
| D101A                       | $\beta$      | 0.6                                  |

<sup>1</sup>Only TCR residues within 6 Å of LLL-HLA-A2 for the wild-type complex structure were mutated to alanine. Wild-type alanine residues were mutated to glycine, and glycine residues were omitted from  $\Delta\Delta G$  calculations.

<sup>2</sup> $\Delta\Delta G$  for alanine substitution, calculated by Rosetta. Values in bold are those with score  $\geq 0.8$  and reflect predicted binding hotspot residues for the interaction with LLL-HLA-A2.
